# Supplementary material
Source: publisher figshare collection journal article supplement (https://sage.figshare.com/ndownloader/files/13438571)
Supplement: Supplementary file 1 [file 13438571]

## Supplement 1

## FLZ Scale: Satisfaction with oneself

**Eigene Person**

[illegible]

### Translation of the FLZ Scale

### Your own person

[illegible]
